# Supplementary material for: Insulin resistance disrupts epithelial repair and niche-progenitor Fgf signaling during chronic liver injury
Source: PLoS Biol. 2019 Jan 29;17(1):e2006972. doi: 10.1371/journal.pbio.2006972 (PMC6368328; doi:10.1371/journal.pbio.2006972)
Supplement: S2 Data — (XLSX) [file pbio.2006972.s015.xlsx]

## Sheet: S1 Fig
	Fgf10
	wt								mean	std deviation	SEM		Irs2-/-								mean	std deviation	SEM
DAY0	0.0135133	0.0145503	0.0234737	0.0243577	0.0145167	0.0129031	0.0141524		0.016781	0.00491474	0.0018576		0.0243577	0.0174035	0.0210825	0.0135759	0.0259856	0.0297463	0.0120112		0.0205947	0.00658707	0.00248968
DA14	0.0120668	0.0165028	0.0198304	0.0132352	0.0239393	0.0124348			0.0163349	0.00475623	0.00194172		0.012207	0.00948934	0.0156668	0.0121508	0.0116558	0.0106268			0.0119661	0.00208862	0.000852677
DAY21	0.0148904	0.0291342	0.0176669	0.0170651	0.0124924	0.0171045			0.0180589	0.00575743	0.00235046		0.0128436	0.0132658	0.0116558	0.00996111	0.0118185	0.0122353	0.0152737	0.00732574	0.0117974	0.00235781	0.000833613
	Fgf22
	wt								mean	std deviation	SEM		Irs2-/-
DAY0	0.00738522	0.00579432	0.0117776	0.0207443	0.0135916	0.0112328	0.00660995		0.0110194	0.00519232	0.00196251		0.00836659	0.0203174	0.00640696	0.014856	0.0293368	0.0729907	0.00559695		0.0225531	0.0238176	0.00900222
DA14	0.00713365	0.0211069	0.0248408	0.0144665	0.0307598	0.0158489			0.0190261	0.00834429	0.00340654		0.0104805	0.0453482	0.00586843	0.013451	0.007428	0.0100073			0.0154306	0.0148888	0.00607831
DAY21	0.0182477	0.0166176	0.0341696	0.0144164	0.0410594	0.00697072			0.0219136	0.0129441	0.00528443		0.0183746	0.00921919	0.0178103	0.00424169	0.0113896	0.0101939	0.0193775	0.0146177	0.0131531	0.00529955	0.00187367

## Sheet: S2 Fig B
	HNF4α- (nuclei/mm2)
		wt						Irs2-/-
	Day DDC diet	Animal #1	Animal #2	Animal #3	Animal #4	Animal #5	Animal #6	Animal #1	Animal #2	Animal #3	Animal #4	Animal #5	Animal #6
	0	1558.75	1390.42	1896.89	1639.92			1998.42	1971.08	2102	1534.72
	14	2963.12	3169.01	3187.54	2967.6	4899.67	3094.73	2819.46	2386.52	2936.27	2734.46	2598.33	2516.79
	21	3485.73	3486.55	3625.46	3725.67			3202.14	2679.83	3244.17	3007.78
	Day 0
	Mean	1621	1902
	Std. Deviation	211	251
	Std. Error of Mean	105.5	125.5
	Day 14
	Mean	3380	2665
	Std. Deviation	750.5	203.1
	Std. Error of Mean	306.4	82.91
	Day 21
	Mean	3581	3033
	Std. Deviation	116.8	257.3
	Std. Error of Mean	58.38	128.6

## Sheet: S2 Fig C
	HNF4α+ (nuclei/mm2)
		wt						Irs2-/-
	Day DDC diet	Animal #1	Animal #2	Animal #3	Animal #4	Animal #5	Animal #6	Animal #1	Animal #2	Animal #3	Animal #4	Animal #5	Animal #6
	0	1548.65	1480.42	1395.83	1531.74			1832.78	1806.5	1830	1962.92
	14	1170.51	1377.61	1227.28	1262.07	1261.78	1113.07	1096.39	962.899		1247.24	1524.32	995.039
	21	1238.75	1579.33	1318.15	1212.13			908.403	763.287	1213.6	1040.24
	Day 0
	Mean	1489	1858
	Std. Deviation	68.65	70.9
	Std. Error of Mean	34.32	35.45
	Day 14
	Mean	1235	1165
	Std. Deviation	90.41	229.3
	Std. Error of Mean	36.91	102.5
	Day 21
	Mean	1337	981.4
	Std. Deviation	167.7	191.7
	Std. Error of Mean	83.83	95.87

## Sheet: S2 Fig D
Hepatocytes Size Distribution (DDC day 21)
Frequency (nuclei/mm2)	wt				Irs2-/-
Nuclear area (µm2)	Animal #1	Animal #2	Animal #3	Animal #4	Animal #1	Animal #2	Animal #3	Animal #4		Nuclear area distribution (mm2)	Mean WT	Mean Irs2-/-	Mean Diff,	SE of diff,	t
24.99	24.6667	34.1111	27.8704	12.6852	9.72222	6.43518	14.6154	7.15686		24.99	24.83	9.482	15.35	6.164	2.49
29.99	51.3333	84.4444	60.1852	33.7037	19.0278	17.3148	38.2051	20.098		29.99	57.42	23.66	33.76	6.164	5.476
34.99	69.5	102.222	77.5	44.2593	25.1389	20.6018	43.5897	32.7451		34.99	73.37	30.52	42.85	6.164	6.952
39.99	82	111.555	89.3518	60.0926	37.1528	26.3426	53.718	38.7745		39.99	85.75	39	46.75	6.164	7.585
44.99	89.75	128.333	97.037	77.1296	42.6389	31.0648	68.0769	55.1961		44.99	98.06	49.24	48.82	6.164	7.92
49.99	94.6667	133	96.0185	93.9815	51.1111	37.037	75	68.7745		49.99	104.4	57.98	46.44	6.164	7.533
54.99	112.083	127.667	102.222	95.9259	58.6111	42.8241	81.2821	74.7549		54.99	109.5	64.37	45.11	6.164	7.317
59.99	109.583	118.111	97.5926	98.4259	64.0278	45.3241	83.9744	77.402		59.99	105.9	67.68	38.25	6.164	6.205
64.99	106	121.889	100.741	99.7222	65.3472	52.4074	85.3205	78.1373		64.99	107.1	70.3	36.78	6.164	5.968
69.99	98	116.778	86.9444	98.7963	68.75	48.3796	85.8974	76.7647		69.99	100.1	69.95	30.18	6.164	4.896
74.99	87.9167	99.1111	89.6296	92.7778	64.0972	51.713	87.4359	81.0294		74.99	92.36	71.07	21.29	6.164	3.454
79.99	68.5833	83	78.1482	78.2407	62.4306	48.1482	89.8077	85.5392		79.99	76.99	71.48	5.512	6.164	0.8941
84.99	57.5833	68.5555	68.1482	70.7408	56.1111	45.787	84.8718	72.2549		84.99	66.26	64.76	1.501	6.164	0.2435
89.99	42.8333	53.5555	50.9259	49.9074	47.1528	40.5093	71.7308	59.5588		89.99	49.31	54.74	-5.432	6.164	0.8813
94.99	32	39.6667	44.4444	41.2963	39.5139	36.8055	57.1795	43.6765		94.99	39.35	44.29	-4.942	6.164	0.8017
99.99	26.9167	30.2222	33.6111	33.0556	32.5695	32.5	43.0128	29.5588		99.99	30.95	34.41	-3.459	6.164	0.5611
104.99	19.8333	25.6667	23.3333	27.4074	27.6389	29.3518	27.7564	27.2059		104.99	24.06	27.99	-3.928	6.164	0.6372
109.99	16	22.4444	20.7407	20.8333	23.8889	22.5926	22.4359	20.7843		109.99	20	22.43	-2.421	6.164	0.3927
114.99	13.0833	21.8889	16.4815	15.6481	20.3472	21.0185	15.4487	19.4118		114.99	16.78	19.06	-2.281	6.164	0.3701
119.99	9.33333	15.4444	13.7037	17.3148	17.7778	19.3982	13.0128	16.0784		119.99	13.95	16.57	-2.618	6.164	0.4247
124.99	8.41667	12.8889	10.3704	12.037	15	14.3519	11.6667	12.9412		124.99	10.93	13.49	-2.562	6.164	0.4156
129.99	6.08333	8.77778	8.42592	8.7963	12.6389	13.1019	9.42308	10.049		129.99	8.021	11.3	-3.282	6.164	0.5325
134.99	3.33333	4.66667	6.75926	9.62963	9.51389	10.9259	8.39744	7.5		134.99	6.097	9.084	-2.987	6.164	0.4846
139.99	2.58333	3.66667	5.55556	5.09259	7.43056	9.35185	5.89744	6.66667		139.99	4.225	7.337	-3.112	6.164	0.5049
144.99	2	1.77778	3.05556	3.7037	6.94444	7.17593	5.1282	4.85294		144.99	2.634	6.025	-3.391	6.164	0.5501
149.99	1.16667	2	2.5	3.7963	5.27778	6.99074	2.94872	3.03922		149.99	2.366	4.564	-2.198	6.164	0.3566
154.99	0.833333	1.66667	1.48148	1.57407	4.23611	5.18518	2.62821	2.40196		154.99	1.389	3.613	-2.224	6.164	0.3608
159.99	0.75	1.55556	1.38889	0.740741	3.125	4.39815	2.30769	1.81373		159.99	1.109	2.911	-1.802	6.164	0.2924
164.99	0.25	1.77778	1.01852	1.11111	2.36111	2.68519	1.60257	1.17647		164.99	1.039	1.956	-0.917	6.164	0.1488
169.99	0.0833333	0.666667	1.2037	1.11111	1.875	2.91667	1.02564	1.02941		169.99	0.7662	1.712	-0.9455	6.164	0.1534
174.99	0.5	0.222222	0.462963	0.37037	1.31944	1.89815	0.897436	0.539216		174.99	0.3889	1.164	-0.7747	6.164	0.1257
179.99	0.25	0.777778	0.37037	0.740741	0.833333	1.75926	0.641026	0.735294		179.99	0.5347	0.9922	-0.4575	6.164	0.07422
184.99	0.166667	0.222222	0.277778	0.462963	1.25	1.89815	0.512821	0.490196		184.99	0.2824	1.038	-0.7554	6.164	0.1225

## Sheet: S3 Fig A
	Frequency (nuclei/mm2)	wt				wt circularity
	Nuclear area (µm2)	Animal #1	Animal #2	Animal #3	Animal #4	Animal #1	Animal #2
	24.99	36.0417	36.3542	27.197	34.7727	0.827659	0.837072
	29.99	97.2917	103.542	83.6364	97.5758	0.843408	0.848585
	34.99	115.833	130.625	121.742	145.303	0.833118	0.837366
	39.99	151.25	159.479	161.818	187.5	0.835161	0.846593
	44.99	180.729	208.646	190.227	213.864	0.853058	0.864375
	49.99	154.583	151.146	147.803	183.712	0.837196	0.848407
	54.99	144.062	116.354	125.682	137.197	0.838438	0.824132
	59.99	161.875	128.75	134.167	121.818	0.856292	0.8298
	64.99	149.688	140.729	120.985	110.303	0.863214	0.843068
	69.99	110.833	99.375	85.6818	92.8788	0.845002	0.830509
	74.99	68.5417	55.8333	52.8788	58.4849	0.821407	0.792698
	79.99	43.0208	36.875	37.8788	42.4242	0.780358	0.760322
	84.99	32.3958	27.3958	26.2121	26.8182	0.756617	0.729004
	89.99	23.8542	20.2083	20.303	19.3939	0.750668	0.717418
	94.99	18.6458	15.2083	15.1515	15.1515	0.792251	0.734014
	99.99	14.4792	14.375	12.5758	11.0606	0.723655	0.695688
	104.99	11.0417	8.95833	8.25758	9.39394	0.713764	0.742523
	109.99	10	8.125	7.27273	6.66667	0.693469	0.698231
	114.99	7.29167	6.25	5.98485	6.13636	0.654743	0.677367
	119.99	4.27083	3.75	3.18182	3.78788	0.700829	0.682583
	124.99	2.1875	2.1875	2.5	2.65151	0.683095	0.646524
	129.99	2.60417	2.08333	1.43939	1.9697	0.72204	0.6626
	134.99	2.08333	1.25	0.833333	0.833333	0.67285	0.78
	139.99	1.5625	0.625	0.833333	0.378788	0.669067	0.563333
	144.99	1.04167	0.3125	0.227273	0.0757576	0.7442	0.551667
	149.99	0.9375	0.729167	0.681818	0.606061	0.675889	0.731143
	154.99	0.3125	0.416667	0.227273	0.227273	0.884	0.7095
	159.99	0.625	0.104167	0	0.378788	0.752167	0.669
	164.99	0.3125	0.3125	0.227273	0.0757576
	169.99	0.3125	0	0	0.151515

## Sheet: S3 Fig B
			Estimated DNA content (RU)
			HNF4α+ cells, circularity >0,8				HNF4α- cells, circularity >0,8
		Nuclear area range (µm2)	Wt #1	Wt #2	Wt #3	Wt #4	Wt #1	Wt #2	Wt #3	Wt #4
	"2c"	(24,99-34,99]	1.86864	1.76974	1.8848	1.76019	2.12801	1.90636	2.04624	1.91939
	"4c"	(34,99-49,99]	4.33794	3.95903	4.18582	3.86606
	"8c"	(59,99-69,99]	9.2857	8.33591	8.79159	7.97913
	"16c"	(89,99-99,99]	17.9248	16.1847	17.1726	15.1896

## Sheet: S3 Fig C
	Cell density (nuclei/mm2)
		wt						Irs2-/-
	Day DDC diet	Animal #1	Animal #2	Animal #3	Animal #4	Animal #5	Animal #6	Animal #1	Animal #2	Animal #3	Animal #4	Animal #5	Animal #6
	0	165.9	185.4	166.7	198.3			135.6	137.3	103.2	166.9
	14	43.9855	54.5496	56.558	82	55.1111	45.6667	55.7364	39.4203		52.3684	87.716	28.1008
	21	90.0833	131.889	94.7222	53.4259			30.3472	25.9259	53.3333	35.1961
	Day 0
	Mean	179.1	135.8
	Std. Deviation	15.67	26.03
	Std. Error of Mean	7.833	13.01
	Day 14
	Mean	56.31	52.67
	Std. Deviation	13.64	22.46
	Std. Error of Mean	5.567	10.04
	Day 21
	Mean	92.53	36.2
	Std. Deviation	32.09	12.03
	Std. Error of Mean	16.04	6.016

## Sheet: S4 Fig B
	Vimentin				Thy1				Elastin				α-SMA
	Staining area (RU)				Staining area (RU)				Staining area (RU)				Staining area (RU)
	wt	Irs2-/-			wt	Irs2-/-			wt	Irs2-/-			wt	Irs2-/-
Animal #1	6.96667	7.94333		Animal #1	14.48	23.215		Animal #1	19.54	64.955		Animal #1	6.349	12.6103
Animal #2	9.25667	5.83333		Animal #2	12.985	20.05		Animal #2	28.615	60.84		Animal #2	6.74733	9.25567
Animal #3	6.48667	11.8533		Animal #3	14.99	49.115		Animal #3	26.98	42.31		Animal #3	5.434	8.89967
Animal #4	8.57333	6.54333		Animal #4	15.5	21.64		Animal #4	39.67	42.985		Animal #4	3.263	2.25
Mean	7.821	8.043		Mean	14.49	28.51		Mean	28.7	52.77		Mean	5.448	8.254
Std. Deviation	1.309	2.687		Std. Deviation	1.086	13.8		Std. Deviation	8.311	11.81		Std. Deviation	1.557	4.338
Std. Error of Mean	0.6543	1.344		Std. Error of Mean	0.5428	6.9		Std. Error of Mean	4.155	5.907		Std. Error of Mean	0.7786	2.169

## Sheet: S6 Fig A
	Tgfb
	wt								mean	std deviation	SEM		Irs2-/-								mean	std deviation	SEM
DAY0	0.67	0.49	1.01	0.81	0.8	0.58	0.85		0.744286	0.176244	0.0666139		1.06	1.01	0.97	1.19	1.67	1.54	0.81		1.17857	0.314665	0.118932
DAY7	1.32	0.7	1.6						1.20667	0.460579	0.265916		2.43	2.34	2.21						2.32667	0.110604	0.0638575
DA14	1.02	1.68	1.73	1.03	1.6	1.1			1.36	0.34322	0.140119		1.39	1.37	1.69	1.42	1.02	1.1			1.33167	0.241613	0.0986379
DAY21	1.33	1.29	2.51	2.03	1.23	1.92	2.07	2.43	1.85125	0.510754	0.180579		2.01	1.37	1.8	1.28	1.28	1.24	1.48	1.66	1.515	0.281729	0.0996064
	Timp1
	wt								mean	std deviation	SEM		Irs2-/-
DAY0	0.03	0.02	0.05	0.04	0.03	0.05	0.06		0.04	0.0141421	0.00534522		0.07	0.06	0.03	0.13	0.32	0.11	0.14		0.122857	0.0955186	0.0361027
DAY7	0.541	0.159	1.947						0.882333	0.941604	0.543635		2.336	1.05	0.816						1.40067	0.818429	0.47252
DA14	0.36	0.77	1.52	0.57	0.78	0.84			0.806667	0.391799	0.159951		1.04	1.32	1.73	1.08	0.64	0.87			1.11333	0.377554	0.154136
DAY21	1.08	0.74	2.44	2.45	0.92	0.82	1.59	0.74	1.3475	0.730807	0.258379		0.78	1.22	0.76	0.63	0.99	1.14	1		0.931429	0.215285	0.0813701
	Mmp9
	wt								mean	std deviation	SEM		Irs2-/-								mean	std deviation	SEM
DAY0	0.0466231	0.0314788	0.0536178	0.0367068	0.0257465	0.0208644	0.0455057		0.0372204	0.0119606	0.00452066		0.0562185	0.0440572	0.0350087	0.0230438	0.0489976	0.0168107	0.013389		0.0339322	0.0166386	0.00628878
DAY7	0.127231	0.046785	0.154305						0.10944	0.0559242	0.0322879		0.407213	0.198727	0.129007						0.244982	0.144756	0.083575
DA14	0.126061	0.20034	0.343613	0.1011	0.13955	0.139873			0.175089	0.088791	0.0362488		0.0809882	0.138266	0.119813	0.0978821	0.102867	0.126791			0.111101	0.0210207	0.00858165
DAY21	0.0926021	0.156459	0.292976	0.368701	0.246363	0.223579	0.360696	0.319862	0.257655	0.0977152	0.0345475		0.246078	0.257716	0.237971	0.175214	0.208366	0.190411	0.263436	0.284636	0.232978	0.038096	0.013469
	Myc
	wt								mean	std deviation	SEM		Irs2-/-
DAY0	0.07	0.09	0.1	0.11	0.09	0.09	0.11		0.0942857	0.0139728	0.00528121		0.19	0.3	0.25	0.22	0.14	0.11	0.08		0.184286	0.0789213	0.0298294
DAY7	0.485903	0.486174	0.572316						0.514798	0.0498126	0.0287593		0.825909	0.738041	0.851594						0.805181	0.059547	0.0343795
DA14	0.43	0.92	0.45	0.38	0.65				0.566	0.223002	0.0997296		0.68	1.11	0.89	1.44	0.63	0.44			0.865	0.363689	0.148476
DAY21	0.51	0.84	1.19	0.47	0.54	0.93	0.79	1.05	0.79	0.265384	0.0938273		0.77	0.7	0.36	0.58	0.71	1.15			0.711667	0.259493	0.105938
	Kit
	wt								mean	std deviation	SEM		Irs2-/-								mean	std deviation	SEM
DAY0	0.23	0.31	0.58	0.54	0.24	0.16	0.19		0.321429	0.169846	0.0641957		0.3	0.4	0.27	0.2	0.26	0.45	0.3		0.311429	0.0857183	0.0323985
DAY7	0.41	0.4	0.54						0.45	0.0781025	0.0450925		0.87	1.05	1.03						0.983333	0.0986577	0.05696
DA14	0.32	0.2	0.46	0.37	0.36	0.19			0.316667	0.104817	0.0427915		0.59	0.63	0.58	0.51	0.24	0.27			0.47	0.171231	0.0699047
DAY21	0.45	0.27	0.38	0.45	0.37	0.51	0.56	0.39	0.4225	0.0901982	0.0318899		0.8	0.59	0.7	0.2	0.26	0.31	0.44	0.21	0.43875	0.232836	0.0823199
	Ptprc (Cd45)
	wt								mean	std deviation	SEM		Irs2-/-
DAY0	0.704102	0.614374	0.955188	0.970762	0.546082	0.536081	1.03804		0.766375	0.215936	0.0816162		1.52681	1.13199	1.12157	1.42457	1.11511	1.38401	1.21885		1.2747	0.168509	0.0636905
DAY7	1.88843	1.32151	2.63997						1.94997	0.661381	0.381848		5.8856	3.97381	4.40922						4.75621	1.00202	0.578515
DA14	0.952983	1.30784	2.13691	1.03564	1.52329	0.752896			1.28493	0.497714	0.203191		1.24159	1.68629	1.52858	1.62509	1.49194	1.41146			1.49749	0.158627	0.0647591
DAY21	1.70392	2.07128	1.19239	2.35195	1.65159	1.8453			1.80274	0.395144	0.161317		1.64588	0.87389	1.39364	1.37286	1.28241	1.7277			1.38273	0.302474	0.123484

## Sheet: S6 Fig C
				Cd3+ density (cells/mm2)
				wt	Irs2-/-
			Animal #1	35.1433	84.805
			Animal #2	51.4417	75.6367
			Animal #3	44.3117	76.6583
			Animal #4	48.895	72.835
			Animal #5	36.4183	61.6283
			Animal #6	27.7583	43.165
			Animal #7	39.725	43.295
			Mean	40.53	65.43
			Std. Deviation	8.297	16.64
			Std. Error of Mean	3.136	6.288

[truncated: 7 more sheets: S7 Fig A, S7 Fig B, S8 Fig C, S8 Fig F, S9 Fig, S10 Fig A, S10 Fig B]
